# Supplementary material for: Electroconvulsive seizures (ECS) do not prevent LPS-induced behavioral alterations and microglial activation
Source: Springer Nature journal article supplement (doi:10.1186/s12974-015-0454-x), 2015-12-01
Supplement: MOESM1 [file 9768964]

**S11: Body weight (percentage compared to day 0)**

| Day | Sham + PBS |      | ECS + PBS |      | Sham + LPS |      | ECS + LPS |      |
|-----|------------|------|-----------|------|------------|------|-----------|------|
|     | Mean       | Sem  | Mean      | Sem  | Mean       | Sem  | Mean      | Sem  |
| 1   | 99,52      | 0,61 | 98,58     | 1,25 | 98,77      | 0,80 | 98,00     | 1,05 |
| 2   | 98,46      | 0,49 | 98,22     | 1,55 | 97,73      | 1,23 | 97,54     | 1,16 |
| 3   | 97,98      | 0,76 | 96,46     | 1,60 | 97,72      | 1,47 | 96,53     | 0,97 |
| 4   | 97,43      | 0,72 | 95,97     | 1,56 | 96,74      | 1,37 | 96,44     | 1,20 |
| 5   | 98,73      | 0,81 | 95,28     | 1,38 | 97,29      | 1,51 | 96,66     | 1,13 |
| 6   | 98,48      | 0,76 | 95,05     | 1,70 | 97,82      | 1,62 | 95,04     | 1,36 |
| 7   | 98,34      | 0,84 | 95,29     | 1,71 | 96,71      | 1,23 | 95,70     | 1,06 |
| 8   | 98,57      | 0,96 | 96,61     | 1,68 | 98,51      | 1,20 | 96,38     | 1,25 |
| 9   | 97,88      | 0,91 | 96,40     | 1,51 | 98,73      | 1,31 | 96,27     | 1,28 |
| 10  | 97,08      | 0,70 | 96,07     | 1,71 | 97,50      | 1,46 | 95,45     | 1,31 |
| 11  | 96,17      | 0,69 | 93,79     | 1,63 | 86,80      | 0,89 | 84,06     | 1,10 |
| 12  | 95,12      | 1,10 | 93,57     | 1,49 | 85,09      | 1,54 | 84,34     | 1,70 |
| 13  | 95,08      | 1,19 | 93,48     | 1,71 | 89,77      | 2,07 | 88,18     | 1,11 |
