# Supplementary material for: Electroconvulsive seizures (ECS) do not prevent LPS-induced behavioral alterations and microglial activation
Source: Springer Nature journal article supplement (doi:10.1186/s12974-015-0454-x), 2015-12-01
Supplement: MOESM2 [file 9768964]

**S12: Sucrose preference (ratio intake sucrose solution : total fluid intake)**

| Day | Sham + PBS |      | ECS + PBS |      | Sham + LPS |      | ECS + LPS |       |
|-----|------------|------|-----------|------|------------|------|-----------|-------|
|     | Mean       | Sem  | Mean      | Sem  | Mean       | Sem  | Mean      | Sem   |
| -5  | 72,76      | 9,84 | 70,64     | 7,35 | 72,43      | 8,57 | 75,83     | 4,09  |
| -4  | 61,12      | 9,20 | 67,23     | 3,62 | 74,45      | 7,01 | 59,44     | 8,63  |
| -3  | 74,44      | 9,67 | 77,42     | 4,24 | 80,78      | 5,25 | 76,94     | 3,51  |
| -2  | 82,06      | 5,06 | 74,22     | 5,31 | 76,76      | 8,19 | 69,85     | 5,25  |
| -1  | 76,51      | 7,36 | 79,67     | 5,88 | 85,40      | 5,52 | 77,43     | 3,36  |
| 0   | 82,73      | 3,10 | 80,59     | 4,95 | 79,14      | 6,05 | 83,19     | 3,88  |
| 1   | 85,94      | 3,60 | 83,22     | 4,46 | 85,59      | 5,74 | 82,46     | 4,59  |
| 2   | 83,79      | 3,76 | 80,00     | 5,17 | 89,65      | 1,92 | 86,23     | 2,92  |
| 3   | 84,03      | 2,34 | 77,93     | 5,12 | 82,44      | 5,70 | 79,53     | 5,38  |
| 4   | 72,44      | 7,21 | 75,30     | 5,92 | 85,83      | 3,09 | 72,19     | 7,15  |
| 5   | 78,94      | 8,48 | 75,27     | 6,94 | 84,93      | 4,79 | 79,03     | 7,17  |
| 6   | 80,39      | 4,19 | 84,04     | 4,30 | 80,88      | 8,06 | 79,03     | 6,02  |
| 7   | 80,76      | 6,37 | 84,18     | 3,29 | 85,33      | 5,11 | 81,94     | 5,78  |
| 8   | 85,25      | 3,99 | 84,85     | 2,88 | 87,01      | 2,68 | 80,10     | 4,84  |
| 9   | 84,39      | 4,06 | 82,21     | 3,02 | 87,54      | 3,00 | 84,97     | 2,76  |
| 10  | 84,07      | 5,93 | 83,64     | 4,34 | 87,57      | 2,40 | 88,88     | 2,99  |
| 11  | 82,29      | 4,05 | 88,02     | 2,32 | 66,34      | 5,26 | 71,55     | 4,20  |
| 12  | 78,87      | 5,61 | 82,73     | 4,73 | 72,50      | 5,51 | 68,58     | 10,10 |
| 13  | 82,43      | 4,25 | 87,68     | 2,50 | 82,60      | 5,73 | 87,24     | 5,47  |

**AUC day 10-13**

| Group      | Mean   | Sem   |
|------------|--------|-------|
| Sham + PBS | 244,41 | 10,61 |
| ECS + PBS  | 256,41 | 8,31  |
| Sham + LPS | 223,92 | 10,72 |
| ECS + LPS  | 233,60 | 14,56 |
