# Supplementary material for: Electroconvulsive seizures (ECS) do not prevent LPS-induced behavioral alterations and microglial activation
Source: Springer Nature journal article supplement (doi:10.1186/s12974-015-0454-x), 2015-12-01
Supplement: MOESM3 [file 9768964]

**S13: Open field test**

| Distance (m) |      |      |
|--------------|------|------|
| Group        | Mean | Sem  |
| Sham + PBS   | 5,50 | 0,27 |
| ECS + PBS    | 5,80 | 0,41 |
| Sham + LPS   | 4,66 | 0,34 |
| ECS + LPS    | 4,95 | 0,52 |

| Time spent in border (%) |       |      |
|--------------------------|-------|------|
| Group                    | Mean  | Sem  |
| Sham + PBS               | 66,23 | 2,52 |
| ECS + PBS                | 76,37 | 2,78 |
| Sham + LPS               | 69,52 | 3,00 |
| ECS + LPS                | 75,71 | 2,49 |

| Grooming (%) |      |      |
|--------------|------|------|
| Group        | Mean | Sem  |
| Sham + PBS   | 1,95 | 0,28 |
| ECS + PBS    | 1,85 | 0,24 |
| Sham + LPS   | 2,74 | 0,61 |
| ECS + LPS    | 3,83 | 0,88 |

| Rearing (%) |       |      |
|-------------|-------|------|
| Group       | Mean  | Sem  |
| Sham + PBS  | 12,49 | 1,30 |
| ECS + PBS   | 10,65 | 0,89 |
| Sham + LPS  | 9,96  | 1,26 |
| ECS + LPS   | 7,98  | 1,19 |
