# Supplementary material for: Electroconvulsive seizures (ECS) do not prevent LPS-induced behavioral alterations and microglial activation
Source: Springer Nature journal article supplement (doi:10.1186/s12974-015-0454-x), 2015-12-01
Supplement: MOESM4 [file 9768964]

#### S14: Microglial activity and number of cells

Microglial activity (ratio cell bodies : total coverage; percentage compared to sham+PBS group)

| CA3        |       |      |
|------------|-------|------|
| Group      | Mean  | Sem  |
| Sham + PBS | 100,0 | 12,8 |
| ECS + PBS  | 101,6 | 6,3  |
| Sham + LPS | 313,4 | 41,7 |
| ECS + LPS  | 250,2 | 31,8 |

| CA1        |       |      |
|------------|-------|------|
| Group      | Mean  | Sem  |
| Sham + PBS | 100,0 | 8,4  |
| ECS + PBS  | 97,4  | 9,7  |
| Sham + LPS | 184,3 | 10,6 |
| ECS + LPS  | 196,4 | 7,2  |

| DG         |       |      |
|------------|-------|------|
| Group      | Mean  | Sem  |
| Sham + PBS | 100,0 | 5,9  |
| ECS + PBS  | 105,4 | 5,8  |
| Sham + LPS | 230,7 | 11,5 |
| ECS + LPS  | 236,8 | 21,5 |

| Hilus      |       |      |
|------------|-------|------|
| Group      | Mean  | Sem  |
| Sham + PBS | 100,0 | 10,9 |
| ECS + PBS  | 114,3 | 9,1  |
| Sham + LPS | 223,0 | 17,2 |
| ECS + LPS  | 203,4 | 16,1 |

Number of microglia / square mm

| CA3        |        |       |
|------------|--------|-------|
| Group      | Mean   | Sem   |
| Sham + PBS | 240,80 | 22,47 |
| ECS + PBS  | 255,52 | 22,92 |
| Sham + LPS | 557,23 | 65,43 |
| ECS + LPS  | 517,93 | 49,49 |

| CA1        |        |       |
|------------|--------|-------|
| Group      | Mean   | Sem   |
| Sham + PBS | 219,85 | 10,57 |
| ECS + PBS  | 221,55 | 19,40 |
| Sham + LPS | 238,61 | 7,91  |
| ECS + LPS  | 266,40 | 15,07 |

| DG         |        |       |
|------------|--------|-------|
| Group      | Mean   | Sem   |
| Sham + PBS | 218,18 | 14,80 |
| ECS + PBS  | 215,72 | 9,88  |
| Sham + LPS | 307,29 | 26,44 |
| ECS + LPS  | 357,54 | 38,56 |

| Hilus      |        |       |
|------------|--------|-------|
| Group      | Mean   | Sem   |
| Sham + PBS | 322,45 | 33,32 |
| ECS + PBS  | 313,34 | 18,70 |
| Sham + LPS | 529,62 | 37,42 |
| ECS + LPS  | 507,28 | 42,23 |
